# Supplementary material for: Polarity-assisted formation of hollow-frame sheathed nitrogen-doped nanofibrous carbon for supercapacitors
Source: Royal Society of Chemistry journal article supplement (doi:10.1039/c8nr09454c), 2019-01-01
Supplement: c8nr09454c1.pdf [file c8nr09454c1.pdf]

## Supporting information

# Polarity-Assisted Formation of Hollow-Frame Sheathed Nitrogen-Doped Nanofibrous Carbon for Supercapacitor

Yujiao Gong,<sup>a</sup> Ruyi Chen,<sup>a</sup> Hai Xu,<sup>a</sup> Chenyang Yu,<sup>a</sup> Xi Zhao,<sup>a</sup> Yue Sun,<sup>a</sup> Zengyu Hui,<sup>a</sup> Jinyuan Zhou,<sup>c</sup> Jianing An,<sup>d\*</sup>  
Zhuzhu Du,<sup>a</sup> Gengzhi Sun<sup>a\*</sup> and Wei Huang<sup>ab</sup>

<sup>a</sup>Key Laboratory of Flexible Electronics (KLOFE) & Institute of Advanced Materials (IAM), Nanjing Tech University (NajingTech), 30 South Puzhu Road, Nanjing 211816, P. R. China

<sup>b</sup>Institute of Flexible Electronics (IFE), Northwestern Polytechnical University, 127 West Youyi Road, Xi'an 710072, P. R. China

<sup>c</sup>School of Physical Science and Technology, Lanzhou University, 222 South Tianshui Road, Lanzhou 730000, P. R. China

<sup>d</sup>School of Mechanical and Aerospace Engineering, Nanyang Technological University, 50 Nanyang Avenue, Singapore 639798, Singapore

\*Corresponding author: [anjianing@ntu.edu.sg](mailto:anjianing@ntu.edu.sg); [iamgzsun@njtech.edu.cn](mailto:iamgzsun@njtech.edu.cn)

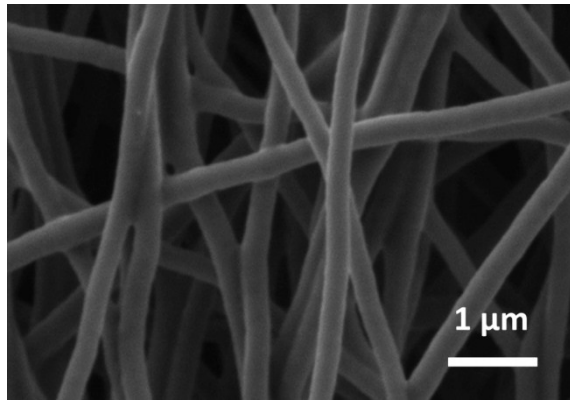

**Figure S1.** SEM image of CNF.

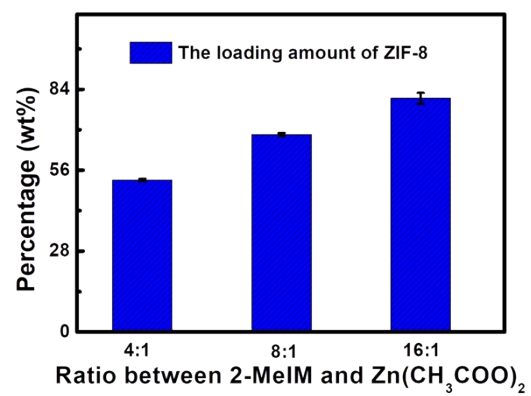

**Figure S2.** The loading amount of ZIF-8 obtained at different ratios between 2-MeIM and Zn(CH<sub>3</sub>COO)<sub>2</sub>.

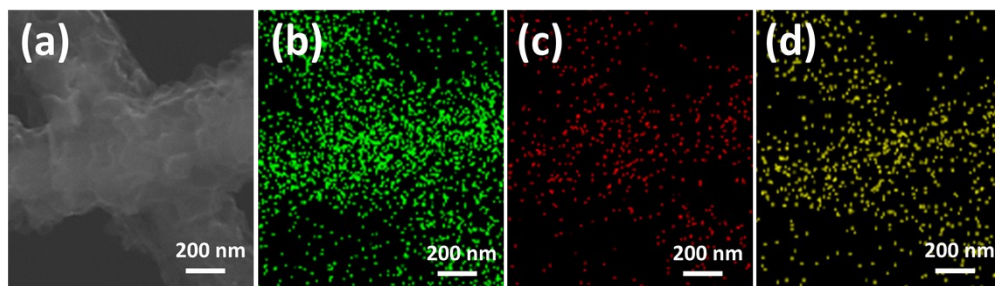

**Figure S3.** (a) SEM image of N-NFC-8. (b-d) EDS element mapping images of C, N, and O.

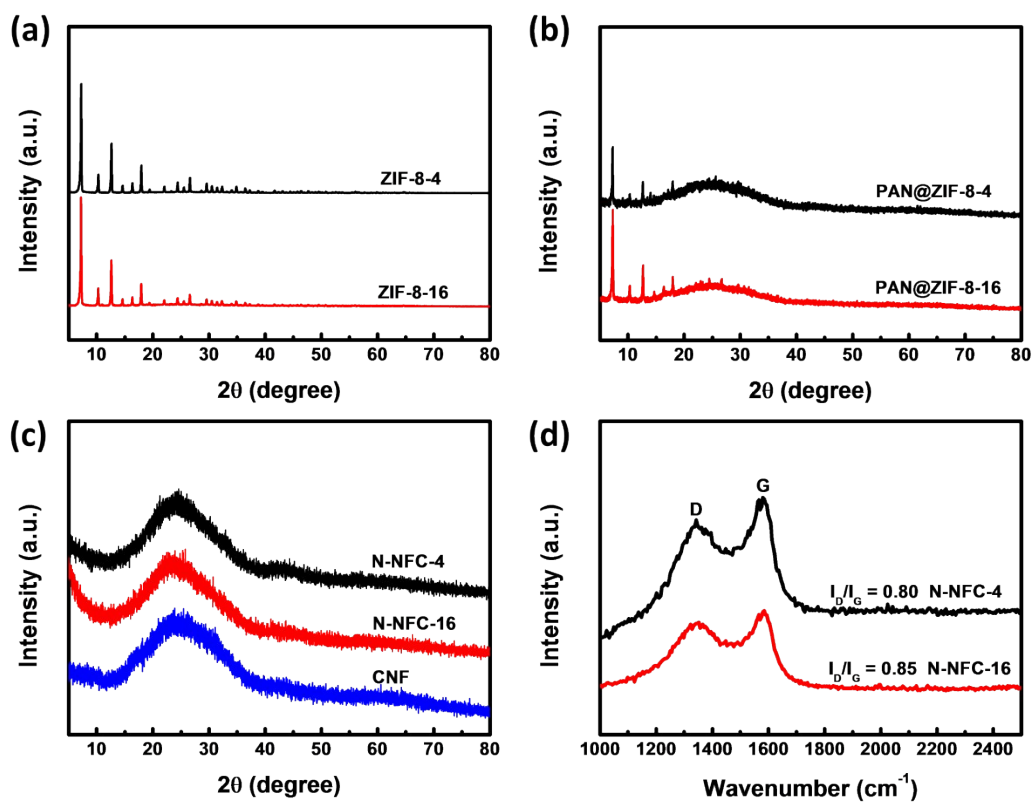

**Figure S4.** XRD patterns of (a) ZIF-8-4 and ZIF-8-16, (b) PAN@ZIF-8-4 and PAN@ZIF-8-16, and (c) N-NFC-4, N-NFC-16 and CNF. (d) Raman spectra of N-NFC-4 and N-NFC-16.

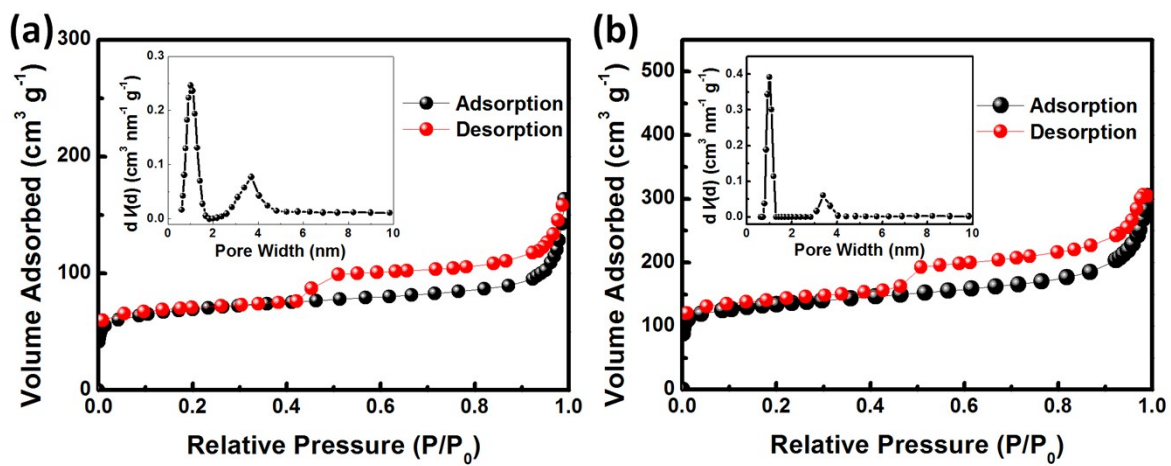

**Figure S5.** Nitrogen adsorption/desorption isotherms and the corresponding pore-size-distribution curves of (a) N-NFC-4 and (b) N-NFC-16.

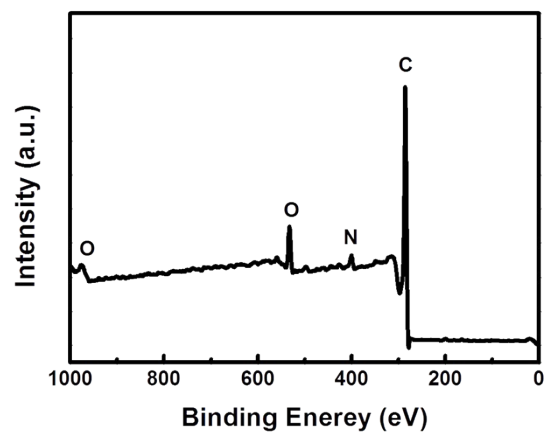

**Figure S6.** XPS survey of N-NFC-8.

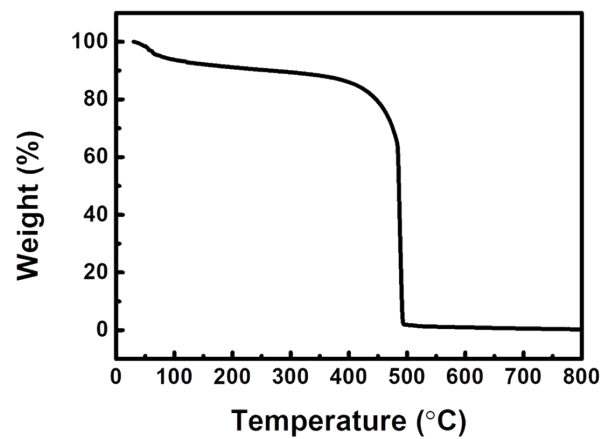

**Figure S7.** Thermogravimetric analysis (TGA) curve of N-NFC-8 with the ramping rates of  $10^{\circ}\text{C min}^{-1}$ .



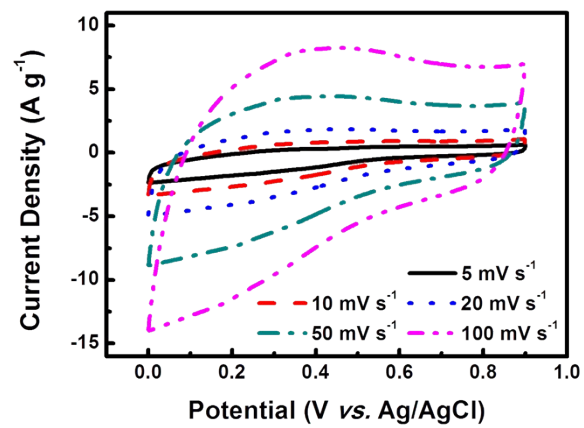

**Figure S8.** CV curves of CNF at different scan rates in three-electrode system.

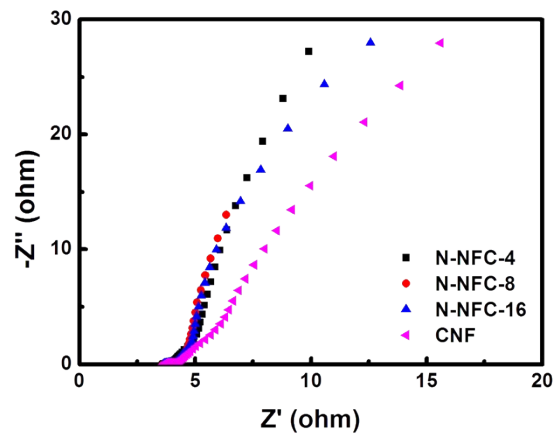

**Figure S9.** Nyquist plots of CNF, N-NFC-4, N-NFC-8 and N-NFC-16, respectively.

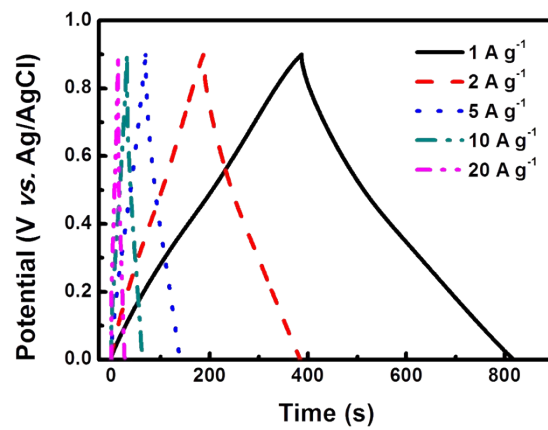

**Figure S10.** Galvanostatic charge-discharge curves of N-NFC-8 at different current densities in three-electrode system.

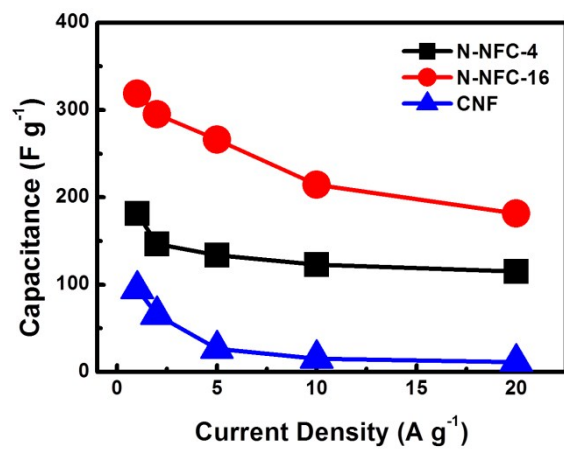

**Figure S11.** Rate-dependent specific capacitance of N-NFC-4, N-NFC-16 and CNF, respectively.

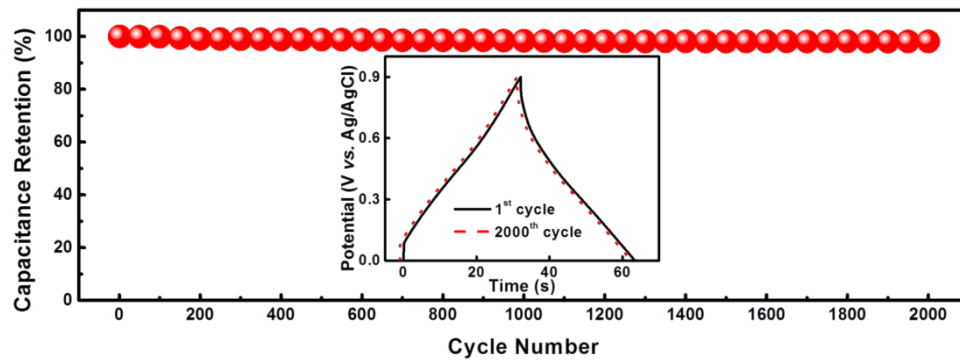

**Figure S12.** Cycling performance of the N-NFC-8 in 1 M H<sub>2</sub>SO<sub>4</sub> at the current density of 10 A g<sup>-1</sup>. Inset shows the GCD curves of the 1<sup>st</sup> and 2000<sup>th</sup> cycle.

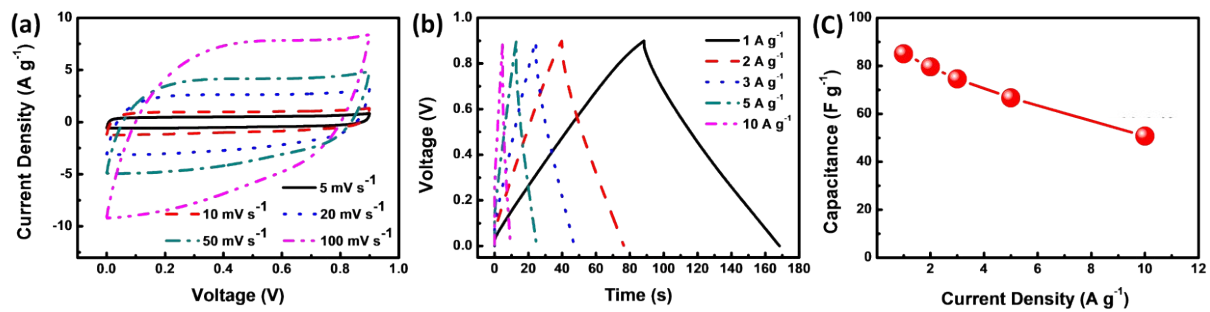

**Figure S13.** Two-electrode test of N-NFC-8 in 1 M H<sub>2</sub>SO<sub>4</sub> electrolyte. (a) CV curves at different scan rates, (b) galvanostatic charge-discharge curves at different current densities and (c) rate-dependent specific capacitance.

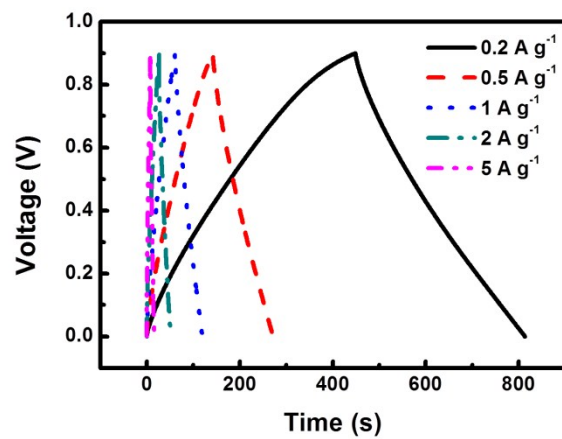

**Figure S14.** Galvanostatic charge-discharge curves of N-NFC-8 at different current densities in two-electrode system.
